# Supplementary material for: Mycobacterium abscessus Strain Morphotype Determines Phage Susceptibility, the Repertoire of Therapeutically Useful Phages, and Phage Resistance
Source: PubMed Central journal article supplement (PMC8092298; doi:10.1128/mbio.03431-20), 2021-03-30
Supplement: mBio.03431-20-sf003.pdf [file mBio.03431-20-sf003.pdf]

# phiGD57-1 (MabC)

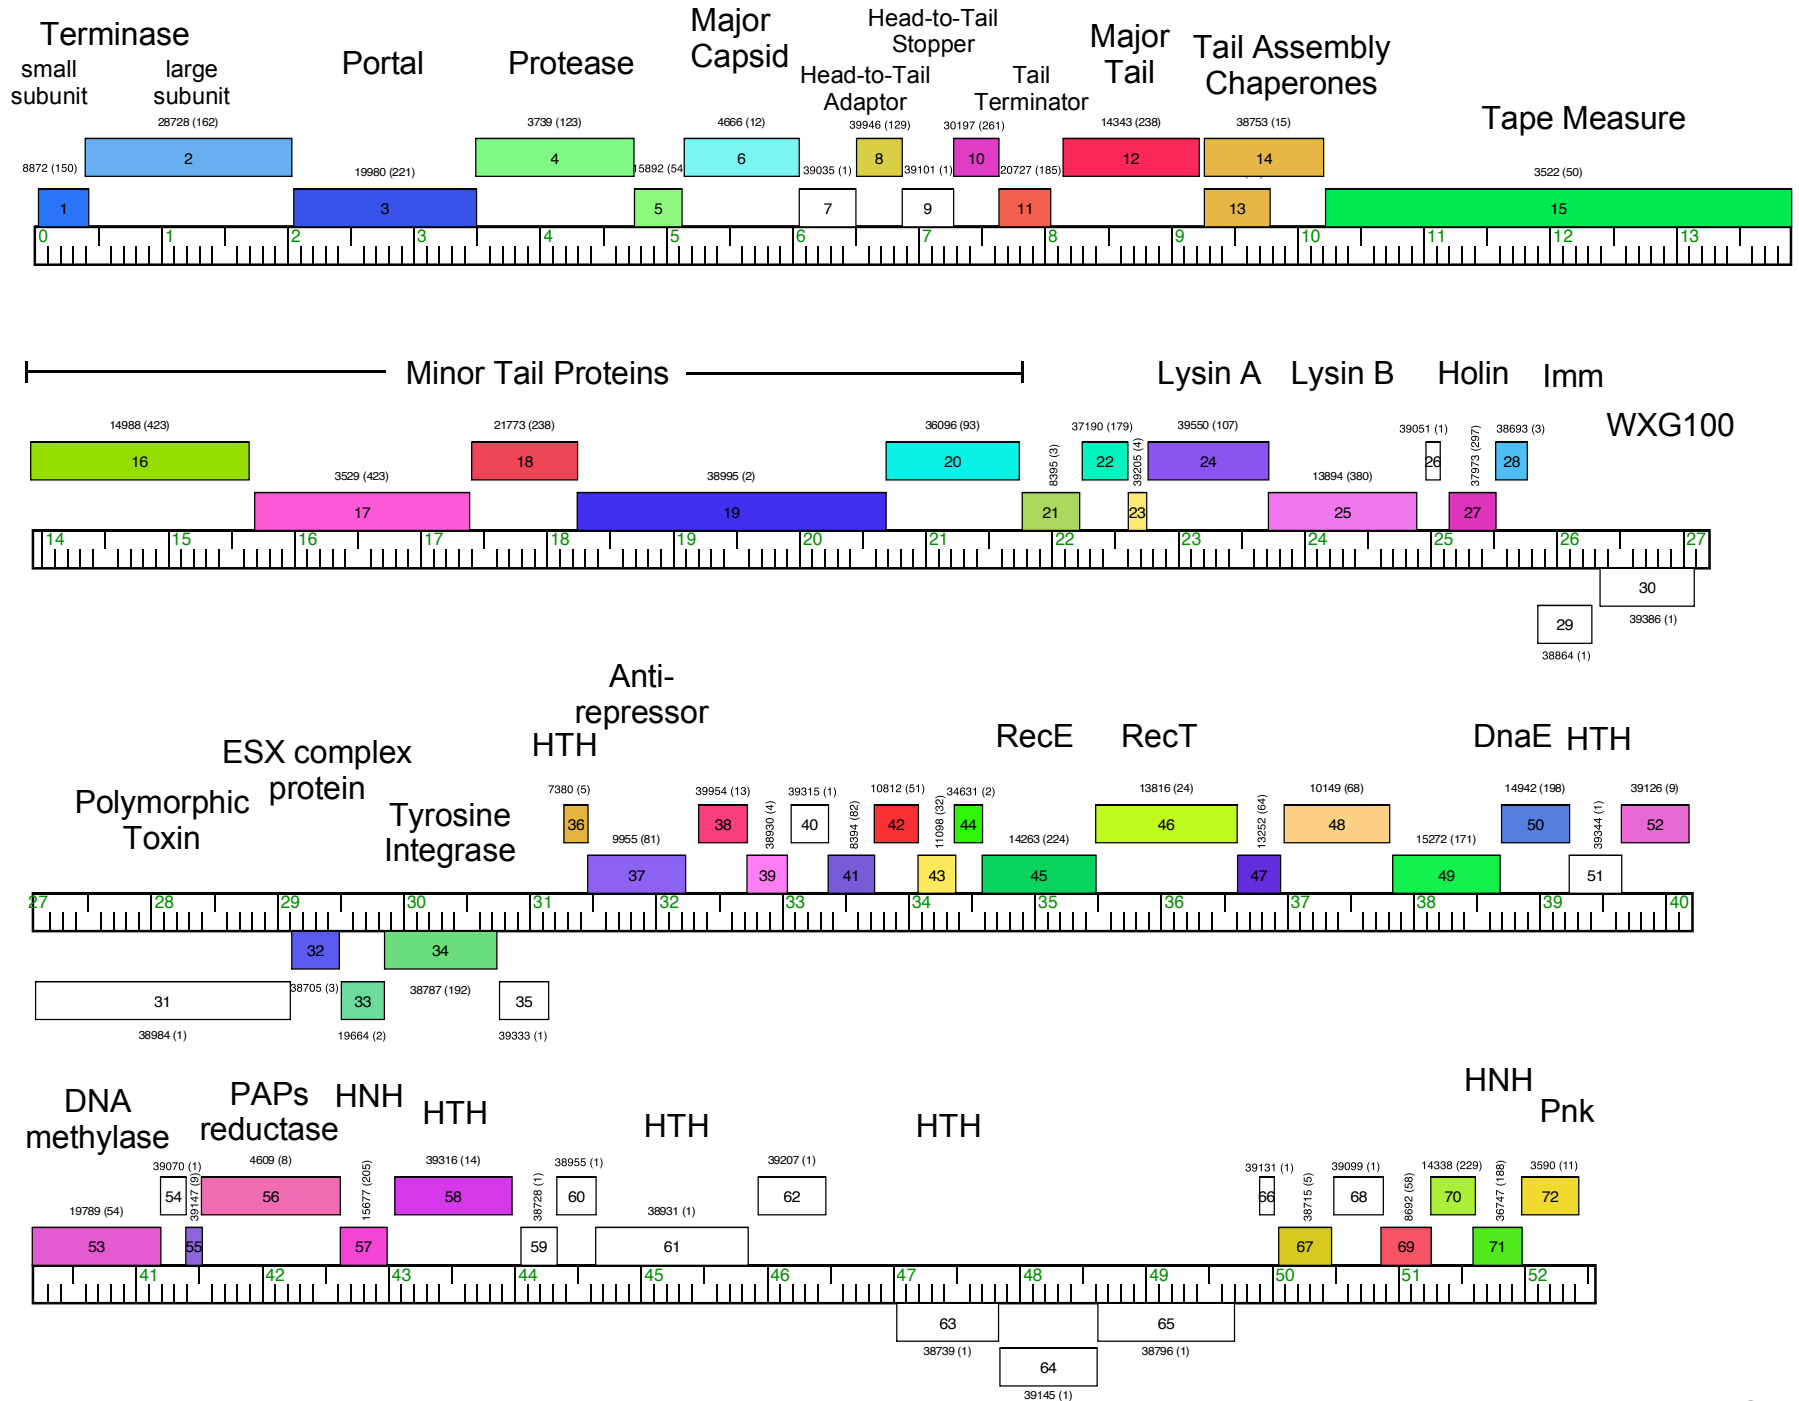

Figure S3
