# Supplementary material for: Mycobacterium abscessus Strain Morphotype Determines Phage Susceptibility, the Repertoire of Therapeutically Useful Phages, and Phage Resistance
Source: PubMed Central journal article supplement (PMC8092298; doi:10.1128/mbio.03431-20), 2021-03-30
Supplement: mBio.03431-20-st001.pdf [file mBio.03431-20-st001.pdf]

Table S1. Sequencing details of *Mycobacterium abscessus* clinical isolates

| Strain <sup>1</sup> | Length (bp) <sup>2</sup> | Contigs <sup>3</sup> | Coverage <sup>4</sup> | Status <sup>5</sup> | GenBank Accession <sup>6</sup>                                                                            |
|---------------------|--------------------------|----------------------|-----------------------|---------------------|-----------------------------------------------------------------------------------------------------------|
| GD01A               | 4901034                  | 1                    | 421                   | Complete            | <a href="#">CP035923</a>                                                                                  |
| GD01B               | 4889373                  | 1                    | 180                   | Complete            | <a href="#">CP035924</a>                                                                                  |
| GD02                | 5000184                  | 27                   | 402                   | WGS                 | <a href="#">JADLKQ000000000</a>                                                                           |
| GD03                | 5010693                  | 35                   | 459                   | WGS                 | <a href="#">JADWWQ000000000</a>                                                                           |
| GD04                | 5120596                  | 43                   | 547                   | WGS                 | <a href="#">JADWWR000000000</a>                                                                           |
| GD05                | 5352395                  | 1                    | 88                    | Complete            | <a href="#">CP065287</a>                                                                                  |
| GD08                | 5192767                  | 52                   | 81                    | WGS                 | <a href="#">JADWWS000000000</a>                                                                           |
| GD09                | 5036145                  | 76                   | 52                    | WGS                 | <a href="#">JADWWT000000000</a>                                                                           |
| GD10                | 5073834                  | 92                   | 92                    | WGS                 | <a href="#">JADLKR000000000</a>                                                                           |
| GD11                | 5195782                  | 50                   | 64                    | WGS                 | <a href="#">JADWWU000000000</a>                                                                           |
| GD12                | 5086633                  | 52                   | 98                    | WGS                 | <a href="#">JADWWV000000000</a>                                                                           |
| GD13                | 5269564                  | 55                   | 72                    | WGS                 | <a href="#">JADWWW000000000</a>                                                                           |
| GD14                | 5022135                  | 44                   | 88                    | WGS                 | <a href="#">JADWWX000000000</a>                                                                           |
| GD15                | 5067256                  | 48                   | 55                    | WGS                 | <a href="#">JADWWY000000000</a>                                                                           |
| GD16                | 5008827                  | 56                   | 126                   | WGS                 | <a href="#">JADWWZ000000000</a>                                                                           |
| GD17                | 5107403                  | 1                    | 85                    | Complete            | <a href="#">CP063165</a>                                                                                  |
| GD18                | 5002397                  | 70                   | 60                    | WGS                 | <a href="#">JADWXA000000000</a>                                                                           |
| GD19                | 4915323                  | 1                    | 64                    | Complete            | <a href="#">CP063328</a> , <a href="#">CP063329</a>                                                       |
| GD20                | 5026147                  | 1                    | 52                    | Complete            | <a href="#">CP063327</a>                                                                                  |
| GD21                | 5218527                  | 1                    | 107                   | Complete            | <a href="#">CP065284</a> , <a href="#">CP065285</a> , <a href="#">CP065286</a>                            |
| GD22                | 5073923                  | 1                    | 51                    | Complete            | <a href="#">CP063324</a> , <a href="#">CP063325</a> , <a href="#">CP063326</a>                            |
| GD23                | 5093402                  | 47                   | 63                    | WGS                 | <a href="#">JADLKS000000000</a>                                                                           |
| GD24                | 5162219                  | 43                   | 54                    | WGS                 | <a href="#">JADLKT000000000</a>                                                                           |
| GD25                | 5112318                  | 1                    | 70                    | Complete            | <a href="#">CP063320</a> , <a href="#">CP063321</a> , <a href="#">CP063322</a> , <a href="#">CP063323</a> |
| GD26                | 5098671                  | 1                    | 86                    | Complete            | <a href="#">CP063319</a>                                                                                  |
| GD27                | 5067484                  | 44                   | 95                    | WGS                 | <a href="#">JADLKU000000000</a>                                                                           |
| GD28                | 4812590                  | 36                   | 54                    | WGS                 | <a href="#">JADLKV000000000</a>                                                                           |
| GD30                | 4980908                  | 39                   | 56                    | WGS                 | <a href="#">JADWXB000000000</a>                                                                           |
| GD33                | 5144027                  | 62                   | 59                    | WGS                 | <a href="#">JADLKW000000000</a>                                                                           |
| GD34                | 5373015                  | 66                   | 68                    | WGS                 | <a href="#">JADLKY000000000</a>                                                                           |
| GD35                | 5051409                  | 46                   | 119                   | WGS                 | <a href="#">JADLKY000000000</a>                                                                           |
| GD36                | 5430883                  | 110                  | 67                    | WGS                 | <a href="#">JADWXC000000000</a>                                                                           |
| GD37                | 4755296                  | 48                   | 67                    | WGS                 | <a href="#">JADLX000000000</a>                                                                            |
| GD38                | 5182416                  | 1                    | 66                    | Complete            | <a href="#">CP063318</a>                                                                                  |
| GD39                | 5111964                  | 52                   | 71                    | WGS                 | <a href="#">JADWXD000000000</a>                                                                           |
| GD40                | 5043795                  | 44                   | 115                   | WGS                 | <a href="#">JADWXE000000000</a>                                                                           |
| GD41                | 5074858                  | 1                    | 75                    | Complete            | <a href="#">CP065283</a>                                                                                  |
| GD42                | 5197760                  | 1                    | 54                    | Complete            | <a href="#">CP065280</a> , <a href="#">CP065281</a> , <a href="#">CP065282</a>                            |
| GD43A               | 5377795                  | 1                    | 93                    | Complete            | <a href="#">CP065279</a>                                                                                  |
| GD43B               | 5286951                  | 1                    | 88                    | Complete            | <a href="#">CP065278</a>                                                                                  |
| GD44                | 4906511                  | 23                   | 82                    | WGS                 | <a href="#">JADWXF000000000</a>                                                                           |
| GD45                | 5079188                  | 46                   | 99                    | WGS                 | <a href="#">JADLLA000000000</a>                                                                           |
| GD47                | 5084415                  | 45                   | 98                    | WGS                 | <a href="#">JADWYG000000000</a>                                                                           |
| GD51                | 5076192                  | 51                   | 59                    | WGS                 | <a href="#">JADWXH000000000</a>                                                                           |
| GD52                | 5342162                  | 64                   | 68                    | WGS                 | <a href="#">JADLLB000000000</a>                                                                           |
| GD53                | 5237166                  | 39                   | 73                    | WGS                 | <a href="#">CP065033</a>                                                                                  |
| GD54                | 5155522                  | 1                    | 125                   | Complete            | <a href="#">CP065276</a> , <a href="#">CP065277</a>                                                       |
| GD55                | 4990177                  | 44                   | 72                    | WGS                 | <a href="#">JADWXI000000000</a>                                                                           |
| GD56                | 5094848                  | 56                   | 86                    | WGS                 | <a href="#">JADWXJ000000000</a>                                                                           |
| GD57                | 5120346                  | 1                    | 79                    | Complete            | <a href="#">CP065275</a>                                                                                  |
| GD58                | 5136259                  | 43                   | 75                    | WGS                 | <a href="#">JADWXK000000000</a>                                                                           |
| GD59                | 5073623                  | 1                    | 71                    | Complete            | <a href="#">CP065274</a>                                                                                  |
| GD60                | 5178709                  | 118                  | 77                    | WGS                 | <a href="#">JADWXL000000000</a>                                                                           |
| GD61                | 5090086                  | 60                   | 71                    | WGS                 | <a href="#">JADWXM000000000</a>                                                                           |
| GD62                | 5369842                  | 65                   | 64                    | WGS                 | <a href="#">JADWXN000000000</a>                                                                           |
| GD63                | 4733675                  | 121                  | 106                   | WGS                 | <a href="#">JADWXP000000000</a>                                                                           |
| GD64                | 4862420                  | 42                   | 206                   | WGS                 | <a href="#">JADWXP000000000</a>                                                                           |
| GD68A               | 5119772                  | 1                    | 92                    | Complete            | <a href="#">CP065273</a>                                                                                  |
| GD68B               | 5119711                  | 1                    | 62                    | Complete            | <a href="#">CP065272</a>                                                                                  |
| GD69A               | 5162653                  | 1                    | 77                    | Complete            | <a href="#">CP065269</a> , <a href="#">CP065270</a> , <a href="#">CP065271</a>                            |
| GD69B               | 5174676                  | 1                    | 108                   | Complete            | <a href="#">CP065266</a> , <a href="#">CP065267</a> , <a href="#">CP065268</a>                            |
| GD72                | 5132444                  | 162                  | 51                    | WGS                 | <a href="#">JADWXQ000000000</a>                                                                           |

|        |         |     |     |          |                                                     |
|--------|---------|-----|-----|----------|-----------------------------------------------------|
| GD75   | 5017220 | 101 | 44  | WGS      | <a href="#">JADWXR000000000</a>                     |
| GD79   | 4924989 | 52  | 47  | WGS      | <a href="#">JADLLC000000000</a>                     |
| GD81   | 5174487 | 53  | 86  | WGS      | <a href="#">JADWXS000000000</a>                     |
| GD82   | 4946210 | 40  | 78  | WGS      | <a href="#">JADWXT000000000</a>                     |
| GD84   | 5097571 | 53  | 55  | WGS      | <a href="#">JADWXU000000000</a>                     |
| GD85   | 4980587 | 84  | 65  | WGS      | <a href="#">JADWXV000000000</a>                     |
| GD86   | 5263250 | 51  | 92  | WGS      | <a href="#">JADWXW000000000</a>                     |
| GD87   | 5055936 | 136 | 71  | WGS      | <a href="#">JADWXX000000000</a>                     |
| GD88   | 4772874 | 70  | 50  | WGS      | <a href="#">JADWXY000000000</a>                     |
| GD89   | 5055865 | 48  | 103 | WGS      | <a href="#">JADWXZ000000000</a>                     |
| GD90   | 4822336 | 85  | 51  | WGS      | <a href="#">JADWYA000000000</a>                     |
| GD91   | 5312857 | 1   | 99  | Complete | <a href="#">CP065265</a>                            |
| GD92   | 5022095 | 297 | 80  | WGS      | <a href="#">JADWYB000000000</a>                     |
| GD95   | 5140392 | 106 | 51  | WGS      | <a href="#">JADWYC000000000</a>                     |
| GD97   | 4753657 | 38  | 59  | WGS      | <a href="#">JADWYD000000000</a>                     |
| GD100A | 5136515 | 1   | 134 | Complete | <a href="#">CP065263</a> , <a href="#">CP065264</a> |
| GD100B | 5136230 | 1   | 117 | Complete | <a href="#">CP065183</a> , <a href="#">CP065184</a> |
| GD102  | 5261854 | 56  | 92  | WGS      | <a href="#">JADWYE000000000</a>                     |
| GD104  | 5099351 | 33  | 76  | WGS      | <a href="#">JADWYF000000000</a>                     |
| GD108  | 5075504 | 52  | 67  | WGS      | <a href="#">JADWYG000000000</a>                     |
| GD111  | 5112275 | 86  | 66  | WGS      | <a href="#">JADWYH000000000</a>                     |

<sup>1</sup>Strains are given a GDXX designation; multiple isolates from the same patient are designated GDXXA, GDXXB, etc.

<sup>2</sup>For complete genomes, the length is the precise length of the bacterial chromosome. For WGS genomes, length is the sum of the lengths of all assembled contigs and therefore may be smaller or larger than the true genome size.

<sup>3</sup>For WGS genomes, the number of contigs obtained through sequencing and assembly with Unicycler.

<sup>4</sup>Genome coverage obtained through WGS sequencing for each strain.

<sup>5</sup>Genome sequencing with Illumina whole genome sequencing or Illumina and Nanopore to completion.

<sup>6</sup>Main chromosome accession numbers are provided first, followed, if applicable, by plasmid accession numbers.
