# Supplementary material for: Mycobacterium abscessus Strain Morphotype Determines Phage Susceptibility, the Repertoire of Therapeutically Useful Phages, and Phage Resistance
Source: mBio. 2021 Mar 30;12(2):e03431-20. doi: 10.1128/mBio.03431-20 (PMC8092298; doi:10.1128/mBio.03431-20)
Supplement: TABLE S2 [file mBio.03431-20-st002.pdf]

Table S2. Genomic differences in smooth and rough *Mycobacterium abscessus* clinical isolates

| Strain | Subsp <sup>1</sup> | R or S <sup>2</sup> | Differences <sup>3</sup>                                        | ATCC19977 coordinates <sup>4</sup>                    | Comments      |
|--------|--------------------|---------------------|-----------------------------------------------------------------|-------------------------------------------------------|---------------|
| GD43A  | a                  | S                   | wt                                                              | wt                                                    |               |
| GD43B  | a                  | R                   | 1 bp change, stop in <i>mps1</i>                                | G4158543C                                             |               |
| GD68A  | m                  | R                   | 1 bp insertion in <i>mps1</i>                                   | 1 bp insertion at 4154628                             |               |
| GD68B  | m                  | S                   | wt                                                              | wt                                                    |               |
| GD69A  | a                  | R                   | wt                                                              | wt                                                    |               |
| GD69B  | a                  | S                   | Two changes elsewhere in genome                                 | No changes in this region                             |               |
| GD100A | a                  | S                   | wt                                                              | wt                                                    |               |
| GD100B | a                  | R                   | 1 bp change causing Y321C in <i>mps2</i>                        | T4149638C                                             |               |
| GD01   | a                  | R                   | 1 bp insertion in <i>mmpL4a</i>                                 | 1 bp insertion at 4180153                             |               |
| GD02   | m                  | R                   |                                                                 | Some bp differences                                   |               |
| GD05   | a                  | R                   | 3 bp insertion in <i>mps2</i>                                   | 3 bp insertion at 4147522                             |               |
| GD08   | a                  | R                   | 2 bp deletion in <i>mps2</i>                                    | 2 bp deletion at 4144550                              |               |
| GD10   | m                  | R                   | 1 bp deletion in <i>mps1</i>                                    | 1 bp deletion at 4154573                              |               |
| GD11   | a                  | R                   | 1 bp insertion in <i>mps1</i>                                   | 1 bp insertion at 4153951                             |               |
| GD12   | a                  | R                   |                                                                 |                                                       | Only part seq |
| GD13   | a                  | R                   | 3430 bp deletion in <i>mps1</i>                                 | 3430 bp del 4155216 - 4158646                         |               |
| GD14   | a                  | R                   |                                                                 | 1 bp difference                                       |               |
| GD15   | a                  | R                   | 2 bp insertion in <i>mps1</i>                                   | 2 bp insertion at 4150877                             | Same as GD41  |
| GD17   | a                  | R                   | None identified                                                 |                                                       |               |
| GD19   | a                  | R                   | 35 bp insertion in <i>mps1</i>                                  | 35 bp insertion at 4157643                            |               |
| GD20   | a                  | R                   | 2 1bp substitutions; <i>mps2</i> , 4105c                        | G4150037A; A4165005G                                  |               |
| GD22   | a                  | R                   | 1 bp deletion in <i>mps2</i>                                    | 1 bp deletion at 4149483                              |               |
| GD23   | a                  | R                   |                                                                 | 1 bp difference                                       |               |
| GD24   | a                  | R                   | 68 bp duplication in <i>mps1</i>                                | 68 bp dup of 4159794 - 4159898                        |               |
| GD25   | a                  | R                   | 12 bp deletion in <i>mps2</i>                                   | 12 bp deletion 4150491-4150502                        |               |
| GD26   | a                  | R                   | 1 bp deletion in <i>mps1</i>                                    | 1 bp deletion at 4156043                              |               |
| GD27   | a                  | R                   |                                                                 | 1 bp difference                                       |               |
| GD30   | m                  | R                   |                                                                 | Minor bp differences                                  |               |
| GD35   | a                  | R                   | 1 bp deletion in <i>mps1</i>                                    | 1 bp deletion at 4160455                              | Same as GD38  |
| GD38   | a                  | R                   | 1 bp deletion in <i>mps1</i>                                    | 1 bp deletion at 4160455                              | Same as GD35  |
| GD40   | a                  | R                   |                                                                 | Three base differences                                |               |
| GD41   | a                  | R                   | 2 bp insertion in <i>mps1</i>                                   | 2 bp insert at 4150877                                | Same as GD41  |
| GD45   | a                  | R                   | 1 bp insertion in <i>mps1</i>                                   | 1 bp deletion at 4159934                              |               |
| GD51   | a                  | R                   | 1 bp insertion in <i>mps1</i>                                   | 1 bp insertion at 4159093                             |               |
| GD52   | a                  | R                   | 2 bp deletion in <i>mps1</i>                                    | 2 bp deletion at 4154035                              |               |
| GD54   | a                  | R                   | 1 bp del in <i>mps1</i>                                         | 1bp del 4160654                                       | Same as GD86  |
| GD56   | a                  | R                   |                                                                 |                                                       | Only part seq |
| GD57   | a                  | R                   | 1 bp ins in <i>mps2</i>                                         | 1 bp insertion at 4144093                             |               |
| GD59   | a                  | R                   |                                                                 | Minor bp differences                                  |               |
| GD60   | m                  | R                   | 1 bp insertion in <i>mps2</i><br>1 bp deletion in <i>mmpL4b</i> | 1 bp insertion at 4146273<br>1 bp deletion at 4177862 |               |
| GD62   | a                  | R                   |                                                                 |                                                       | Only part seq |
| GD79   | m                  | R                   | 1 bp insertion in <i>mps1</i>                                   | 1 bp insertion at 4152255                             |               |
| GD82   | m                  | R                   | 2 bp deletion in <i>mps2</i>                                    | 2 bp deletion at 4146637                              |               |
| GD86   | a                  | R                   | 1 bp del in <i>mps1</i>                                         | 1 bp del 4160654                                      | Same as GD54  |
| GD87   | a                  | R                   | Many (>40) bp differences                                       |                                                       |               |
| GD88   | a                  | R                   | None identified                                                 |                                                       |               |
| GD89   | a                  | R                   | 1 bp insertion in <i>mps2</i>                                   | 1 bp insertion at 4145405                             |               |
| GD92   | a                  | R                   |                                                                 |                                                       | Only part seq |
| GD95   | a                  | R                   | 1 bp deletion in <i>mps1</i>                                    | 1 bp deletion at 4152166                              |               |
| GD102  | a                  | R                   | 1 bp insertion in <i>mps2</i>                                   | 1 bp insertion at 4144781                             |               |
| GD104  | m                  | R                   |                                                                 | Several bp differences                                |               |
| GD111  | m                  | R                   | 1 bp deletion in <i>mps1</i>                                    | 1 bp deletion at 4151505                              |               |

<sup>1</sup>Subspecies designated: a, *abscessus*; m, *massiliense*.<sup>2</sup>Rough (R) or Smooth (S) colony morphotype<sup>3</sup>Genes affected by mutations in the region MAB\_4117c (*mmpS*) through MAB\_4097c (*gap*). Differences were identified by sequence comparison of ~40 kbp spanning this region with that of *M. abscessus* ATCC19977.<sup>4</sup>Coordinates for mutations are shown corresponding to *M. abscessus* ATCC19977 (Accession #CU45896)
